# Supplementary material for: Complete Chloroplast Genome Analysis of Two Important Medicinal Alpinia Species: Alpinia galanga and Alpinia kwangsiensis
Source: PubMed Central journal article supplement (PMC8714959; doi:10.3389/fpls.2021.705892), 2021-12-15
Supplement: Data_Sheet_1.pdf [file Data_Sheet_1.pdf]

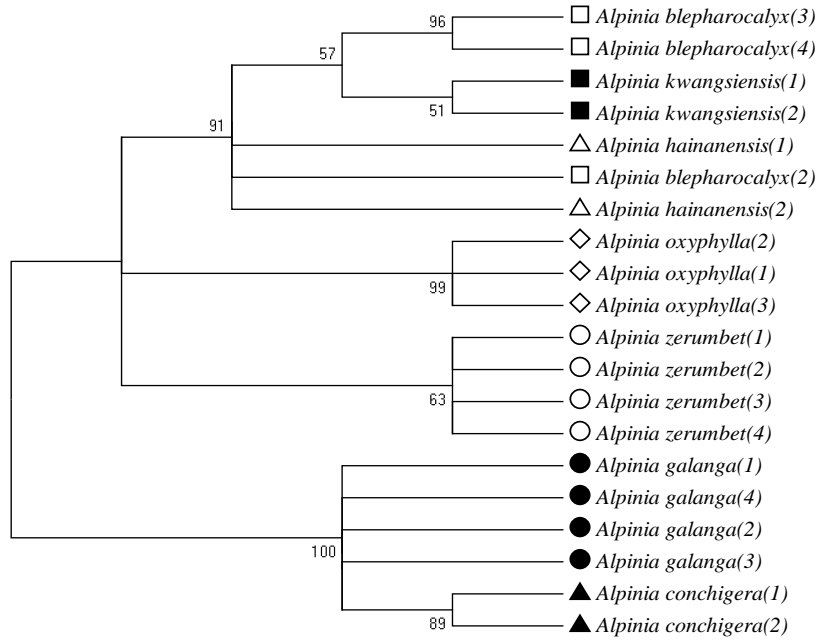

NJ phylogenetic tree of seven *Alpinia* species based on the concatenated sequences of *ndhC-trnV*.

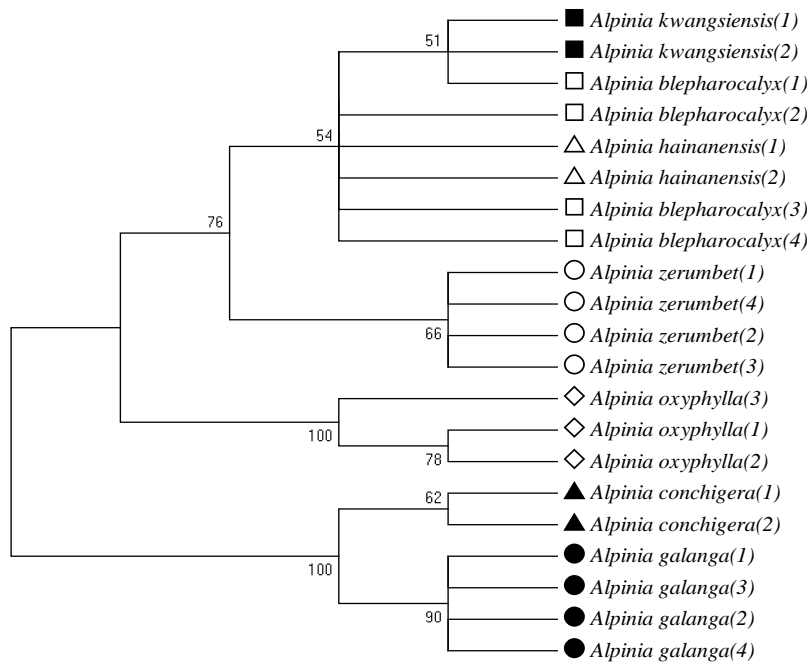

NJ phylogenetic tree of seven *Alpinia* species based on the concatenated sequences of *psaC-ndhE*.

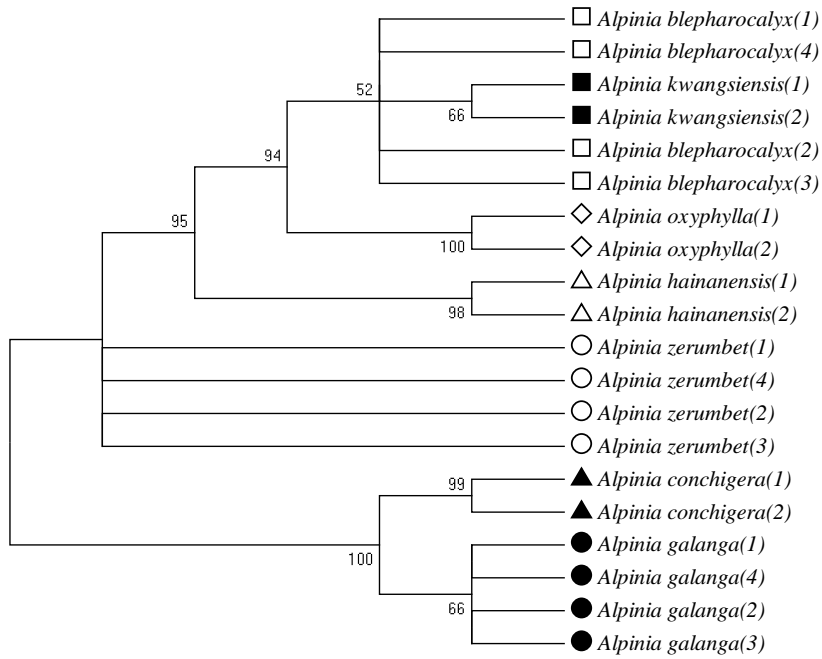

NJ phylogenetic tree of seven *Alpinia* species based on the concatenated sequences of *rpl32-trnL*.

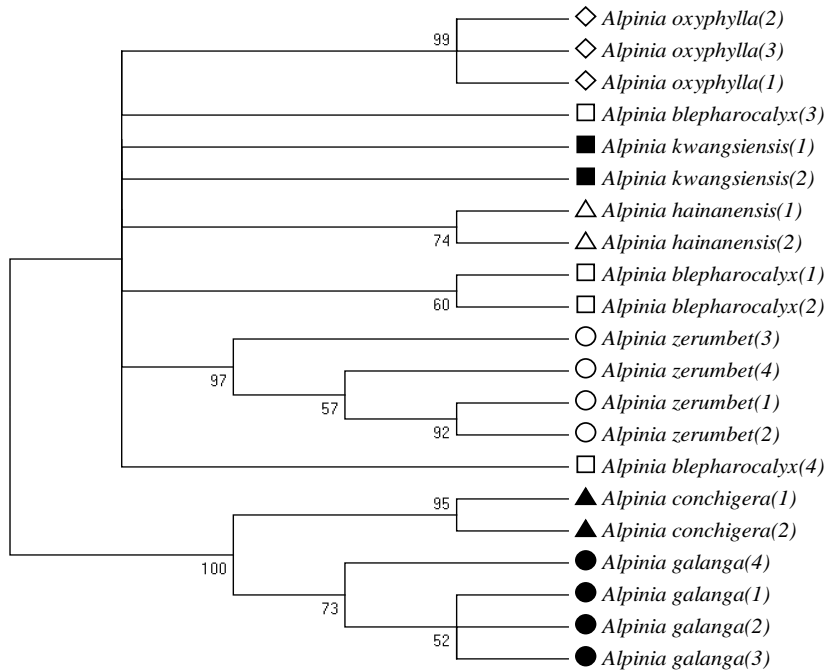

NJ phylogenetic tree of seven *Alpinia* species based on the concatenated sequences of *trnC-petN*.

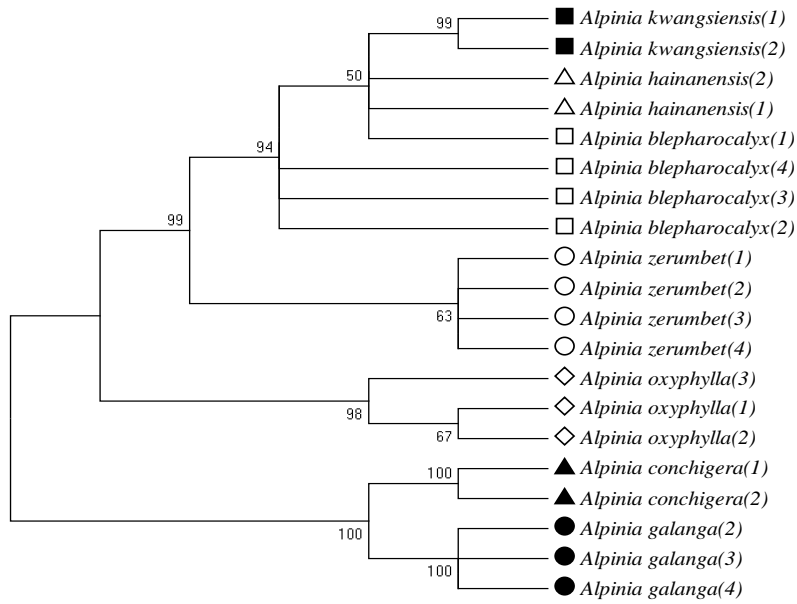

NJ phylogenetic tree of seven *Alpinia* species based on the concatenated sequences of *trnS-trnG*.

**Supplementary Figure 1** Phylogenetic tree constructed using neighbor-joining based on the 5 Barcode Markers of seven *Alpinia* species. Numbers above the branches are the bootstrap support values.
