# Supplementary material for: Complete Chloroplast Genome Analysis of Two Important Medicinal Alpinia Species: Alpinia galanga and Alpinia kwangsiensis
Source: PubMed Central journal article supplement (PMC8714959; doi:10.3389/fpls.2021.705892), 2021-12-15
Supplement: Data_Sheet_2.pdf [file Data_Sheet_2.pdf]

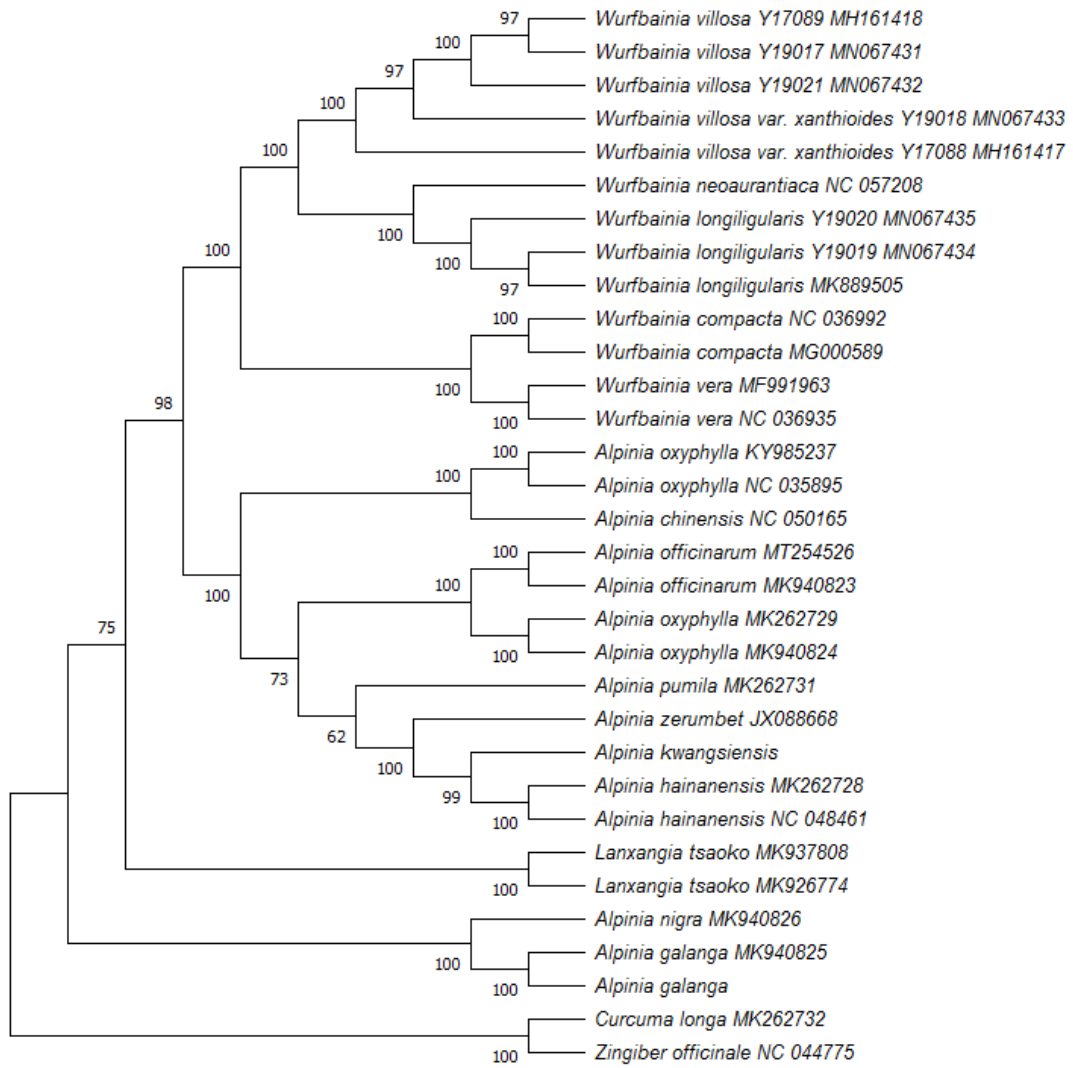

**Supplementary Figure 2** Phylogenetic tree constructed using maximum parsimony (MP) based on the 32 complete CP genomes. Numbers above the branches are the bootstrap support values.
