# Supplementary material for: Complete Chloroplast Genome Analysis of Two Important Medicinal Alpinia Species: Alpinia galanga and Alpinia kwangsiensis
Source: Front Plant Sci. 2021 Dec 15;12:705892. doi: 10.3389/fpls.2021.705892 (PMC8714959; doi:10.3389/fpls.2021.705892)
Supplement: Supplementary file 5 [file Table_2.XLSX]

## Sheet: Gene stat details
A. galanga and A. kwangsiensis genes details Information
GeneName	A. galanga	A. kwangsiensis	position
accD	1533	1533	LSC		LSC	81
atpA	1524	1524	LSC		SSC	12
atpB	1488	1488	LSC		Ira	20
atpE	408	408	LSC		Irb	20
atpF	570	570	LSC			133
atpH	246	246	LSC
atpI	744	744	LSC
ccsA	978	978	SSC
cemA	717	717	LSC
clpP	618	618	LSC
infA	234	234	LSC
matK	1548	1548	LSC
ndhA	1080	1080	SSC
ndhB	1560	1560	IRa
ndhB	1560	1560	IRb
ndhC	363	363	LSC
ndhD	1506	1506	SSC
ndhE	306	306	SSC
ndhF	2211	2211	SSC
ndhG	531	531	SSC
ndhH	1182	1182	SSC
ndhI	543	543	SSC
ndhJ	480	480	LSC
ndhK	753	753	LSC
petA	963	963	LSC
petB	654	654	LSC
petD	483	483	LSC
petG	114	114	LSC
petL	96	96	LSC
petN	90	90	LSC
psaA	2253	2253	LSC
psaB	2205	2205	LSC
psaC	246	246	SSC
psaI	111	111	LSC
psaJ	129	129	LSC
psbA	1062	1062	LSC
psbB	1527	1527	LSC
psbC	1422	1422	LSC
psbD	1062	1062	LSC
psbE	252	252	LSC
psbF	120	120	LSC
psbH	222	222	LSC
psbI	111	111	LSC
psbJ	123	123	LSC
psbK	186	186	LSC
psbL	117	117	LSC
psbM	105	105	LSC
psbN	132	132	LSC
psbT	108	108	LSC
psbZ	189	189	LSC
rbcL	1464	1464	LSC
rpl14	369	369	LSC
rpl16	411	411	LSC
rpl20	429	366	LSC
rpl22	390	390	LSC
rpl23	282	282	IRa
rpl23	282	282	IRb
rpl2	834	834	IRa
rpl2	834	834	IRb
rpl32	174	174	SSC
rpl33	201	201	LSC
rpl36	114	114	LSC
rpoA	1020	1029	LSC
rpoB	3222	3222	LSC
rpoC1	2055	2055	LSC
rpoC2	4137	4128	LSC
rps11	417	417	LSC
rps12	369	369	IRa
rps12	369	369	IRb
rps14	303	303	LSC
rps15	255	258	SSC
rps16	258	258	LSC
rps18	354	354	LSC
rps19	279	279	IRa
rps19	279	279	IRb
rps2	711	711	LSC
rps3	657	657	LSC
rps4	606	606	LSC
rps7	468	468	IRa
rps7	468	468	IRb
rps8	399	399	LSC
rrn16	1491	1491	IRa
rrn16	1491	1491	IRb
rrn23	2807	2808	IRa
rrn23	2807	2808	IRb
rrn4.5	103	103	IRa
rrn4.5	103	103	IRb
rrn5	121	121	IRa
rrn5	121	121	IRb
trnA-UGC	73	73	IRa
trnA-UGC	73	73	IRb
trnC-GCA	81	81	LSC
trnD-GUC	74	74	LSC
trnE-UUC	73	73	LSC
trnF-GAA	73	73	LSC
trnfM-CAU	74	74	LSC
trnG-GCC	71	71	LSC
trnG-UCC	71	71	LSC
trnH-GUG	75	75	IRa
trnH-GUG	75	75	IRb
trnI-CAU	74	74	IRa
trnI-CAU	74	74	IRb
trnI-GAU	77	77	IRa
trnI-GAU	77	77	IRb
trnK-UUU	72	72	LSC
trnL-CAA	81	81	IRa
trnL-CAA	81	81	IRb
trnL-UAA	85	85	LSC
trnL-UAG	80	80	SSC
trnM-CAU	72	72	LSC
trnN-GUU	72	72	IRa
trnN-GUU	72	72	IRb
trnP-UGG	74	74	LSC
trnQ-UUG	73	73	LSC
trnR-ACG	74	74	IRa
trnR-ACG	74	74	IRb
trnR-UCU	72	72	LSC
trnS-GCU	88	88	LSC
trnS-GGA	87	87	LSC
trnS-UGA	92	92	LSC
trnT-GGU	72	72	LSC
trnT-UGU	73	73	LSC
trnV-GAC	72	72	IRa
trnV-GAC	72	72	IRb
trnV-UAC	75	75	LSC
trnW-CCA	74	74	LSC
trnY-GUA	84	84	LSC
ycf1	1392	3843	IRa
ycf1	5457	5388	SSC
ycf2	6852	6804	IRa
ycf2	6852	6804	IRb
ycf3	492	492	LSC
ycf4	555	555	LSC
